# Supplementary material for: Effect of PACAP/PAC1R on Follicle Development of Djungarian Hamster (Phodopus sungorus) with the Variation of Ambient Temperatures
Source: MDPI journal article supplement (doi:10.3390/biology12020315), 2023-02-15
Supplement: s1 [file s1]

## Supplementary Materials

**Table S1. The primers for *PACAP***

| Primer   | Primer sequences                                               | Product Length (bp) | Annealing temperature (°C) |
|----------|----------------------------------------------------------------|---------------------|----------------------------|
| Primer 1 | F:5'-ATCAGACCAGAAGACGAGGCT-3'<br>R:5'-AGTATGCTATTCGGCGTCCTT-3' | 421                 | 58.5                       |
| Primer 2 | F:5'-CGCTGTCCTACTTAGTCAACC-3'<br>R:5'-GGGTCCCAGTCATAGAAGTC-3'  | 216                 | 60.0                       |

**Table S2 The primers for *PACIR***

| Primer   | Primer sequences                                               | Product Length (bp) | Annealing temperature (°C) |
|----------|----------------------------------------------------------------|---------------------|----------------------------|
| Primer 1 | F:5'-CTCCTGCTGCCTGTGGCTATT-3'<br>R:5'-AGTGACTGCTGTCCTGCTCGG-3' | 619                 | 63.5                       |
| Primer 2 | F:5'-AGGTGAGATGGTCCTTGTGAG-3'<br>R:5'-TCTGGAGAGAAGGCGAATACT-3' | 915                 | 58.5                       |
| Primer 3 | F:5'-CATCTACTTACGGCTGGCTCG-3'<br>R:5'-AGAGGGGAGAGGCACAAACAT-3' | 429                 | 60.5                       |

**Table S3 Fluorescence quantitative primers for *PACAP/PACIR***

| Primer       | Primer sequences                                                    | Product Length (bp) | Annealing temperature (°C) |
|--------------|---------------------------------------------------------------------|---------------------|----------------------------|
| <i>PACAP</i> | F:5'-CCTTGCTGGTCTACGGGATAA-3'<br>R:5'-GTTTCCGTCCTGGTCGTAAGT-3'      | 119                 | 59.6                       |
| <i>PACIR</i> | F:5'-CCAAGTGTGGATGACAGAAACC-3'<br>R:5'-CCTTCACCGACAGGTAGTAATAATC-3' | 203                 | 60.1                       |

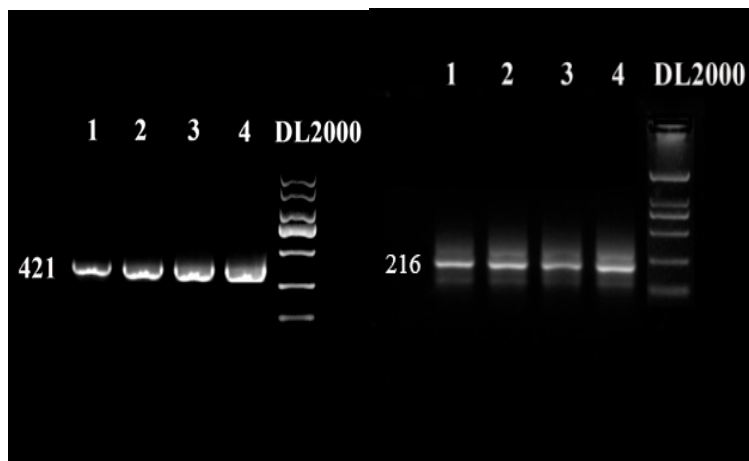

**Figure S1.** RT-PCR amplification of *PACAP* from *Phodopus sungorus*.

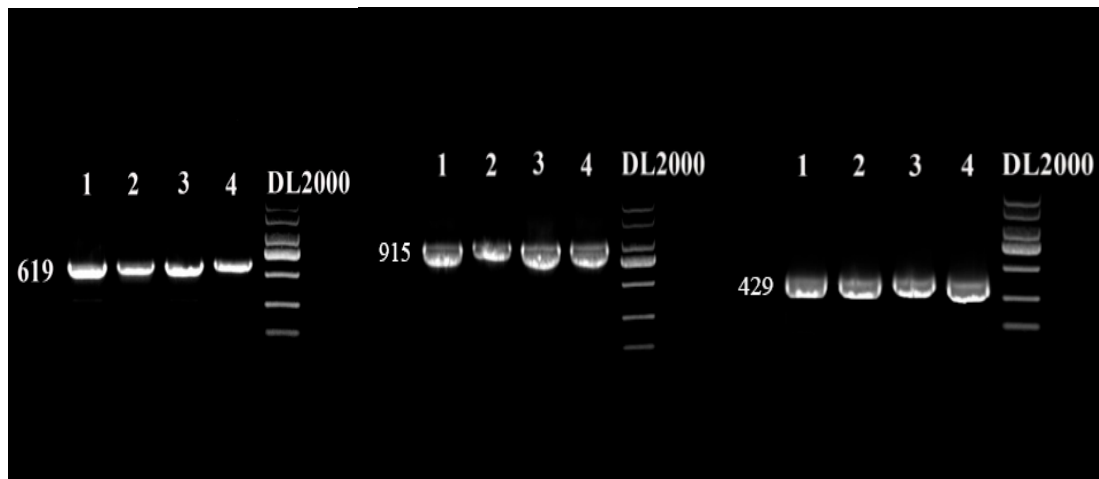

**Figure S2.** RT-PCR amplification of *PAC1R* from *Phodopus sungorus*.
